# Building a COVID-19 Vulnerability Index

DAVE DECAPRIO\*    JOSEPH GARTNER†    CAROL J. MCCALL, FSA, MPH‡

THADEUS BURGESS

SARTHAK KOTHARI

SHAAYAAN SAYED

ClosedLoop.ai

March 15, 2020

## Abstract

*COVID-19 is an acute respiratory disease that has been classified as a pandemic by the World Health Organization. Information regarding this particular disease is limited, however, it is known to have high mortality rates, particularly among individuals with preexisting medical conditions. Creating models to identify individuals who are at the greatest risk for severe complications due to COVID-19 will be useful to help for outreach campaigns in mitigating the diseases worst effects. While information specific to COVID-19 is limited, a model using complications due to other upper respiratory infections can be used as a proxy to help identify those individuals who are at the greatest risk. We present the results for three models predicting such complications, with each model having varying levels of predictive effectiveness at the expense of ease of implementation.*

## I. INTRODUCTION

### i. COVID-19 Virus

Coronaviruses (CoV) are a large family of viruses that cause illness ranging from the common cold to more severe diseases such as Middle East Respiratory Syndrome (MERS-CoV) and Severe Acute Respiratory Syndrome (SARS-CoV). CoV are zoonotic, meaning they are transmitted between animals and people. Coronavirus disease (COVID-19) is a new strain that was discovered in 2019 and has not been previously identified in humans[1].

COVID-19 is a respiratory infection with common signs of infection that include respiratory symptoms, fever, cough, shortness of breath and breathing difficulties. In more severe cases, infection can cause pneumonia, severe acute respiratory syndrome, kidney failure and death.

### ii. Flattening the Curve

On March 11, 2020 the World Health Organization (WHO) declared COVID-19 to be a pandemic[2]. In their press conference, they were clear that pandemic was not a word they used lightly or carelessly or to cause unreasonable fear. They were also clear to highlight that this is the first

---

\*Corresponding author: [dave.decaprio@closedloop.ai](mailto:dave.decaprio@closedloop.ai)

†Corresponding author: [joseph.gartner@closedloop.ai](mailto:joseph.gartner@closedloop.ai)

‡Corresponding author: [carol.mccall@closedloop.ai](mailto:carol.mccall@closedloop.ai)

pandemic to ever be caused by a coronavirus and that all countries can still act to change its course.

Public health and healthcare experts agree that mitigation is required in order to slow the spread of COVID-19 and prevent the collapse of healthcare systems. On any given day, health systems in the United States run close to capacity[3] and so every transmission that can be avoided and every case that can be prevented has enormous impact.

### iii. Identifying Vulnerable People

The risk of severe complications from COVID-19 is higher for certain vulnerable populations, particularly people who are elderly, frail, or have multiple chronic conditions. The risk of death has been difficult to calculate[4], but a small study[5] of people who contracted COVID-19 in Wuhan suggests that the risk of death increases with age, and is also higher for those who have diabetes, disease, blood clotting problems, or have shown signs of sepsis. With an average death rate of 1%, the death rate rose to 6% for people with cancer, high blood pressure and chronic respiratory disease, 7% for people with diabetes, and 10% for people with heart disease. There was also a steep age gradient; the death rate among people aged 80+ was 15%

Identifying who is most vulnerable is not necessarily straightforward. More than 55% of Medicare beneficiaries meet at least one of the risk criteria listed by the CDC[6]. People with the same chronic condition don't have the same risk, and simple rules can fail to capture complex factors like frailty[8] which makes people more vulnerable to severe infections.

## II. METHODS

### i. datasets

Since real world data on COVID-19 cases is not readily available, the CV19 Index was developed using close proxy events. A person's CV19 Index is measured in terms of their near-term risk of severe complications from respiratory infections (e.g. pneumonia, influenza). Specifically, 4 categories of diagnoses were chosen from the Clinical Classification Software Refined (CCSR)[11] classification system:

- RSP002 - Pneumonia (except that caused by tuberculosis)
- RSP003 - Influenza
- RSP005 - Acute bronchitis
- RSP006 - Other specified upper respiratory infections

Machine learning models were created that use a patient's historical medical claims data to predict the likelihood that they will have an inpatient hospital stay due to one of the above conditions in the next 3 months. The data used was an anonymized 5% sample of the Medicare claims data from 2015 and 2016. This data spanned the transition from ICD-9 to ICD-10 on October 1st, 2016. The data set used to create the model was created by identifying all living members above the age of 18 on 9/30/2016. Only fee -for-service members were included because medical claims histories for other members are not reliably complete. We then excluded all members who had less than 6 months of continuous eligibility prior to 9/30/2016. We also excluded members who lost coverage within 3 months after 9/30/2016, except for those members who lost coverage due to death. Table 1 below summarizes the population selection.

The final data set is split 80/20% into train and test sets, with 1,481,654 people in the training set and 369,865 in the test set. The prevalence of the proxy event within the final population was 0.23%.

Building a COVID-19 Vulnerability Index • March, 2020

---

| Cumulative Population Step | Selection Criteria                                                              |
|----------------------------|---------------------------------------------------------------------------------|
| 3,114,713                  | Total members in the data set                                                   |
| 1,867,879                  | Fee for service members with 6 months of continuous coverage prior to 9/30/2016 |
| 1,867,779                  | 18 years old or older                                                           |
| 1,861,868                  | Exclude members with a death date before 9/30/2016                              |
| 1,851,519                  | Exclude members who lose coverage in the next 3 months not due to death.        |

**Table 1:** Features used associated with risk factors identified by CDC and their corresponding CCSR codes.

The labels for the prediction task were created by identifying all patients who had an inpatient visit with an admission date from 10/1/2016 through 12/31/2016 with a primary diagnosis from one of the listed categories. A 3 month delay was imposed on the input features to the model, so that no claims after 6/30/2016 were used to make the predictions. This 3 month delay simulates the delay in claims processing that usually occurs in practical setting and enables the model to be used in realistic scenarios.

## ii. models

We highlight a few approaches to building models to help identify individuals who are vulnerable to complications to respiratory infections. All 3 approaches described are machine learning methods created using the same data set. We have chosen 3 different approaches that represent a tradeoff between accuracy and ease of implementation. For individuals who have access to data, but not the coding background to adopt our model, we hope that the simple model can be easily ported to other systems. For a more robust model, we create a Gradient boosted tree leveraging age, gender, and medical diagnosis history. This model has been made open sourced, and can be obtained from github (<https://github.com/closedloop-ai/cv19index>). Finally, we have created a third model that uses an extensive feature set generated from Medicare claims data along with linked geographical and social determinants of health data. This model is being made freely available through our hosted platform. Information about accessing the platform can be found at <https://cv19index.com>.

## iii. Logistic Regression

The first approach is aimed at reproducing the high level recommendations coming from the Center for Disease Control (CDC) website[7] for identifying those individuals who are at risk. They identify risk features as:

- Older adults
- Individuals with Heart disease
- Individuals with Diabetes
- Individuals with Lung disease

To turn this into a model, we extract International Classification of Diseases, Version 10 (ICD-10) diagnosis codes from the claims and aggregate them using the Clinical Classification Codes Revised (CCSR) categories. We create indicator features for the presence of any code in the CCSR category. The mapping between the CDC risk factors and the CCSR codes are described in

Building a COVID-19 Vulnerability Index • March, 2020

| Feature name                                                    | Coefficient | CCSR Code   |
|-----------------------------------------------------------------|-------------|-------------|
| Intercept                                                       | -5.49       |             |
| Gender male                                                     | -0.212      | n/a         |
| # of Admissions (12M)                                           | 0.186       | n/a         |
| Age                                                             | -0.014      | n/a         |
| Pneumonia except that caused by tuberculosis                    | 0.117       | CCSR:RSP002 |
| Other and ill-defined heart disease                             | -0.111      | CCSR:CIR015 |
| Heart failure                                                   | -0.271      | CCSR:CIR019 |
| Acute rheumatic heart disease                                   | -0.008      | CCSR:CIR002 |
| Coronary atherosclerosis and other heart disease                | -0.529      | CCSR:CIR011 |
| Pulmonary heart disease                                         | -0.005      | CCSR:CIR014 |
| Chronic rheumatic heart disease                                 | -0.014      | CCSR:CIR001 |
| Diabetes mellitus with complication                             | -0.273      | CCSR:END003 |
| Diabetes mellitus without complication                          | -0.496      | CCSR:END002 |
| Chronic obstructive pulmonary disease and bronchiectasis        | -0.269      | CCSR:RSP008 |
| Other specified and unspecified lower respiratory disease       | -0.020      | CCSR:RSP016 |
| age X Pneumonia                                                 | 0.010       | n/a         |
| age X Other and ill-defined heart diseases                      | 0.003       | n/a         |
| age X Heart failure                                             | 0.009       | n/a         |
| age X Acute rheumatic heart disease                             | 0.003       | n/a         |
| age X Coronary atherosclerosis and other heart disease          | 0.011       | n/a         |
| age X Pulmonary heart disease                                   | -0.000      | n/a         |
| age X Chronic rheumatic heart disease                           | -0.001      | n/a         |
| age X Diabetes mellitus with complication                       | 0.007       | n/a         |
| age X Diabetes mellitus without complication                    | 0.009       | n/a         |
| age X Chronic obstructive pulmonary disease and bronchiectasis  | 0.013       | n/a         |
| age X Other specified and unspecified lower respiratory disease | 0.006       | n/a         |

**Table 2:** Features used associated with risk factors identified by CDC and their corresponding CCSR codes.

Table 2. We start with these features as they give us an ability to quantify the portion of the at risk population that are encapsulated by the high level CDC recommendations. In addition to the conditions coming from the recommendations of the CDC, we will look at features that our other modeling efforts surfaced as important and avail those features to the model as well. We also provide gender, age in years, as well as an interaction term between age and the diagnostic features. This simple data set is used to train a logistic regression model[9]. In addition to the CCSR Codes, Table 2 additionally includes

#### iv. Gradient Boosted Trees

Our more robust approach uses gradient boosted trees. Gradient boosted trees are a machine learning method that use an ensemble of simple models to create highly accurate predictions[9]. The resulting models demonstrate higher accuracy. The drawback to these models are that they are significantly more complex, however, "by hand" implementations of such models is impractical. Here, we create two variations of the models. The first, is a model that leverages similar information as our logistic regression model. A nice feature of Gradient Boosted Trees is they are fairly robust against learning features that are eccentricities of the training data, but do

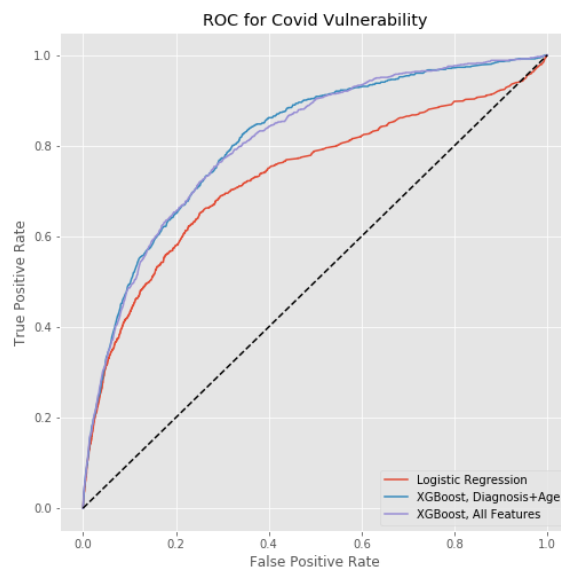

**Figure 1:** A Receiver Operating Characteristic graph depicting the performance of the three models.

not extend well to future data. As such, we allow full diagnosis histories to be leveraged within our simpler XGBoost model. In this approach, every category in the full CCSR is converted into an indicator feature, resulting in 559 features. Details about how to connect the full diagnosis history with the open sourced model are provided with the open sourced version of the mode

We additionally built a model within the ClosedLoop platform. The ClosedLoop platform is a software system designed to enable rapid creation of machine learning models utilizing healthcare data. The full details of the platform are outside the bounds of this paper, however, using the platform allows us to leverage engineered features coming from peer reviewed studies. Examples are social determinants of health, and the Charlson Comorbidity Index[12]. We chose not to include these features within the open sourced model, because the purpose of the open sourced version is to be as accessible as possible for the greater healthcare data science community.

### III. RESULTS AND MODEL INTERPRETATION

We quantify the performance of our models using metrics that are standard within the data science community. In particular, we visualize the performance of our model using a Receiver Operation Characteristic graph, see Figure 1. Additionally, the metrics quantifying the effectiveness of our models are in Table 3. As you can see, the performance of both Gradient Boosted Tree models are very similar. The ROC curve demonstrates that even as the decision threshold increases, the percentage of the potentially affected population increases at roughly the same rate. Similarly, the Logistic Regression model has similar performance at low alert rates. We can see that at a 3% alert rate, the difference in sensitivity is only .02. The performance at higher alert rates experiences a significant performance disadvantage, however, for most interventions this would be at alert rates higher than is practical.

Building a COVID-19 Vulnerability Index • March, 2020

---

| Model Type              | ROC AUC | Sensitivity at 3% Alert Rate | Sensitivity at 5% Alert Rate |
|-------------------------|---------|------------------------------|------------------------------|
| Logistic Regression     | .731    | .214                         | .314                         |
| XGBoost                 |         |                              |                              |
| Diagnosis History + Age | .810    | .234                         | .324                         |
| XGBoost                 |         |                              |                              |
| Full Feature Set        | .810    | .231                         | .327                         |

**Table 3:** Measures of effectiveness for the three models.

#### IV. ACCESSING MODELS

There are two ways of accessing the models that we are providing. The first, is to access our open sourced version of our model. As stated, we have released an open sourced version of the model, available at <https://github.com/closedloop-ai/cv19index>. This model is written in the Python programming language. We have included synthetic data for the purpose of walking individuals through the process of going from tabular diagnosis data to the input format specific for our models. We encourage the healthcare data science community to fork the repository, and adapt it to their own purposes. We encourage collaboration from the open sourced community, and pull requests will be considered for inclusion in the main branch of the package. For those wishing to use our models within our platform, we are providing access to the COVID-19 model free of charge. Please visit <https://closedloop.ai/cv19index> for instructions on how to gain access.

#### V. CONCLUSIONS

This pandemic has already claimed thousands of lives, and sadly, this number is sure to grow. As healthcare resources are constrained by the same scarcity constraints that effect us all, it is important to empower intervention policy with the best information possible. We have provided several models and means of access for those individuals with varying levels of technical expertise. It is our hope that by providing these models quickly to the healthcare data science community, widespread adoption will lead to more effective intervention strategies, and ultimately, help to curtail the worst effects of this pandemic.

#### REFERENCES

- [1] World Health Organization. "Coronavirus." Who.Int, 2019, [www.who.int/emergencies/diseases/novel-coronavirus-2019](http://www.who.int/emergencies/diseases/novel-coronavirus-2019). Accessed 15 Mar. 2020.
- [2] World Health Organization. "WHO Director-General's Opening Remarks at the Media Briefing on COVID-19 - 11 March 2020." Who.Int, 11 Mar. 2020, [www.who.int/dg/speeches/detail/who-director-general-s-opening-remarks-at-the-media-briefing-on-covid-19-11-march-2020](http://www.who.int/dg/speeches/detail/who-director-general-s-opening-remarks-at-the-media-briefing-on-covid-19-11-march-2020). Accessed 15 Mar. 2020.
- [3] Specht, Liz. "Simple Math Offers Alarming Answers about Covid-19, Health Care." STAT, 10 Mar. 2020, [www.statnews.com/2020/03/10/simple-math-alarming-answers-covid-19/](http://www.statnews.com/2020/03/10/simple-math-alarming-answers-covid-19/). Accessed 15 Mar. 2020.

- [4] Page, Michael Le. “Why Is It so Hard to Calculate How Many People Will Die from Covid-19?” *New Scientist*, 11 Mar. 2020, [www.newscientist.com/article/mg24532733-700-why-is-it-so-hard-to-calculate-how-many-people-will-die-from-covid-19/](http://www.newscientist.com/article/mg24532733-700-why-is-it-so-hard-to-calculate-how-many-people-will-die-from-covid-19/). Accessed 15 Mar. 2020.
- [5] Hamzelou, Jessica. “Coronavirus: Risk of Death Rises with Age, Diabetes and Heart Disease.” *New Scientist*, 9 Mar. 2020, [www.newscientist.com/article/2236846-coronavirus-risk-of-death-rises-with-age-diabetes-and-heart-disease/](http://www.newscientist.com/article/2236846-coronavirus-risk-of-death-rises-with-age-diabetes-and-heart-disease/). Accessed 15 Mar. 2020.
- [6] Centers for Disease Control and Prevention. “Coronavirus Disease 2019 (COVID-19).” Centers for Disease Control and Prevention, 11 Feb. 2020, [www.cdc.gov/coronavirus/2019-ncov/specific-groups/high-risk-complications.html](http://www.cdc.gov/coronavirus/2019-ncov/specific-groups/high-risk-complications.html).
- [7] Centers for Disease Control and Prevention. “Coronavirus Disease 2019 (COVID-19).” Centers for Disease Control and Prevention, 11 Feb. 2020, [www.cdc.gov/coronavirus/2019-ncov/specific-groups/high-risk-complications.html](http://www.cdc.gov/coronavirus/2019-ncov/specific-groups/high-risk-complications.html).
- [8] Hubbard, Ruth E, et al. “Frailty Status at Admission to Hospital Predicts Multiple Adverse Outcomes.” *Age and Ageing*, vol. 46, no. 5, 2017, pp. 801–806, [www.ncbi.nlm.nih.gov/pubmed/28531254](http://www.ncbi.nlm.nih.gov/pubmed/28531254), 10.1093/ageing/afx081. Accessed 11 Jan. 2020.
- [9] James, Gareth, et al. *An Introduction to Statistical Learning, with Applications in R*. Springer, 2013.
- [10] “Measures and Data Sources | County Health Rankings and Roadmaps.” *Countyhealthrankings.Org*, University of Wisconsin Population Health Institute, 2019, [www.countyhealthrankings.org/explore-health-rankings/measures-data-sources](http://www.countyhealthrankings.org/explore-health-rankings/measures-data-sources). Accessed 1 Feb. 2020.
- [11] The Healthcare Cost and Utilization Project. “Clinical Classifications Software Refined (CCSR) for ICD-10-CM Diagnoses.” *Www.Hcup-Us.Ahrq.Gov*, [www.hcup-us.ahrq.gov/toolssoftware/ccsr/ccs\\_refined.jsp](http://www.hcup-us.ahrq.gov/toolssoftware/ccsr/ccs_refined.jsp). Accessed 15 Mar. 2020.
- [12] Charlson, M E, et al. “A New Method of Classifying Prognostic Comorbidity in Longitudinal Studies: Development and Validation.” *Journal of Chronic Diseases*, vol. 40, no. 5, 1987, pp. 373–83, 10.1016/0021-9681(87)90171-8.

## VI. APPENDIX: FULL FEATURE LIST

We include a full list of features available within our platform. The majority of features are binary variables indicating if a patient has had one type of medical event 15 months prior to the date of prediction, excluding the 3 most recent months.

Building a COVID-19 Vulnerability Index • March, 2020

---

Gender  
Age  
Social Factor: Current County Health Rankings Analytics  
Social Factor: Current County Health Rankings Outcome and Factors  
Social Factor: Current Social Vulnerability Index  
Social Factor: Current USDA Food Atlas Access  
Social Factor: Current USDA Food Atlas Restaurants  
Social Factor: Current USDA Food Atlas Socioeconomic  
Social Factor: Current Area Deprivation Index  
Prediction Month  
State of Residence  
Medicaid  
Race & Ethnicity  
Prior termination  
Medical Eligibility Months  
# Different Residences (County level)  
Medicare ESRD Status  
Medicare Disability Status  
# Distinct DME Categories (12M)  
Hospice  
# Days Since Last Hospital Discharge  
# Acute Fall-Related Injuries (12M)  
Use of Preventative Services  
Procedure History  
DME  
# ICU Stays (12M)  
'Frailty Indicator  
# of Distinct Providers seen in Office Visits (12M)  
# of Distinct Providers seen in E&M Visits (12M)  
PCP Visit After Discharge  
Discharge Disposition  
OutlierAdmits  
Monthly OOP Cost  
Diagnosis History  
Monthly Medical Cost  
# of Admissions (12M)  
Inpatient Days  
# of Observation Stays  
# of ER Visits (12M)  
# of ER Visits (6M)  
# of Office Visits (12M)  
# of Evaluation and Management Visits (12M)  
Admission Cause  
Charlson Comorbidity Index (CCI)  
Evidence of tobacco smoking

**Table 4:** Full feature list available within platform.



Evidence of smokeless tobacco  
Evidence of tobacco non-use  
Falls risk assessment performed  
Abnormal BMI  
Normal BMI  
LDL  
LVEF  
Systolic Blood Pressure  
Diastolic Blood Pressure  
Continuity of Care Index (12M)  
PQI Any  
PQI Diabetes  
PQI 5  
PQI 7  
PQI 8  
PQI 11  
PQI 12  
# Distinct CCSR Body Systems  
# Distinct CCSR Diagnosis Categories (12M)  
PCS Procedure History  
Prior Respiratory Infections  
Prior Hospital Acquired Infections  
Diagnosis History High-Level

**Table 5:** Full feature list available within platform (continued).
